# Supplementary material
Source: PubMed Central journal article supplement (PMC5393267)
Supplement: NIHMS744951-supplement-SuppFigs.pdf [file NIHMS744951-supplement-SuppFigs.pdf]

**Supplementary figure 1:** Meta-analysis showing the expression of the candidate genes in 16 different datasets.

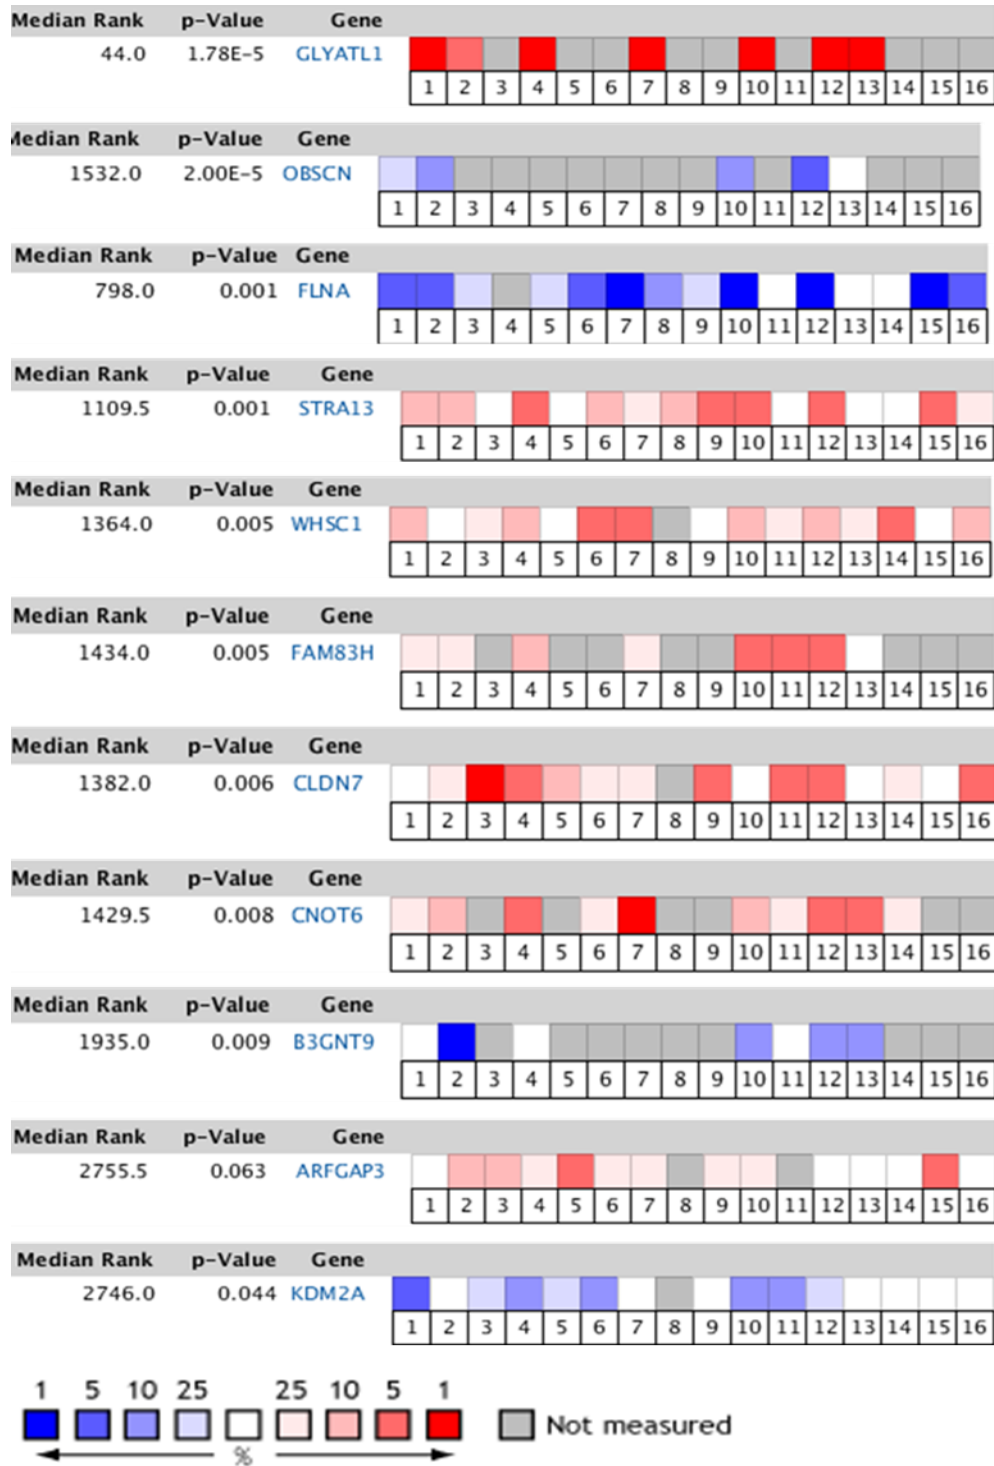

The rank for a gene is the median rank for that gene across each of the analyses.  
 The p-Value for a gene is its p-value for the median-ranked analysis.

cont...

1. Prostate Carcinoma vs. Normal  
*Arredouani Prostate, Clin Cancer Res, 2009*
2. Prostate Carcinoma vs. Normal  
*Grasso Prostate, Nature, 2012*
3. Prostate Carcinoma vs. Normal  
*Holzbeierlein Prostate, Am J Pathol, 2004*
4. Prostate Carcinoma vs. Normal  
*Lapointe Prostate, Proc Natl Acad Sci U S A, 2004*
5. Prostate Carcinoma vs. Normal  
*LaTulippe Prostate, Cancer Res, 2002*
6. Prostate Carcinoma vs. Normal  
*Liu Prostate, Cancer Res, 2006*
7. Prostate Carcinoma vs. Normal  
*Luo Prostate 2, Mol Carcinog, 2002*
8. Prostate Carcinoma vs. Normal  
*Magee Prostate, Cancer Res, 2001*
9. Prostate Carcinoma vs. Normal  
*Singh Prostate, Cancer Cell, 2002*
10. Prostate Carcinoma vs. Normal  
*Taylor Prostate 3, Cancer Cell, 2010*
11. Prostate Carcinoma Epithelia vs. Normal  
*Tomlins Prostate, Nat Genet, 2007*
12. Prostate Adenocarcinoma vs. Normal  
*Vanaja Prostate, Cancer Res, 2003*
13. Prostate Carcinoma vs. Normal  
*Varambally Prostate, Cancer Cell, 2005*
14. Prostate Adenocarcinoma vs. Normal  
*Wallace Prostate, Cancer Res, 2008*
15. Prostate Carcinoma vs. Normal  
*Welsh Prostate, Cancer Res, 2001*
16. Prostate Carcinoma vs. Normal  
*Yu Prostate, J Clin Oncol, 2004*

**Supplementary figure 2:** Integration sites mapped on the human genome. Provirus: Chromosome junctions were identified and mapped to human genome using UCSC genome browser. Arrows (red) indicate the provirus integration sites on the chromosome.

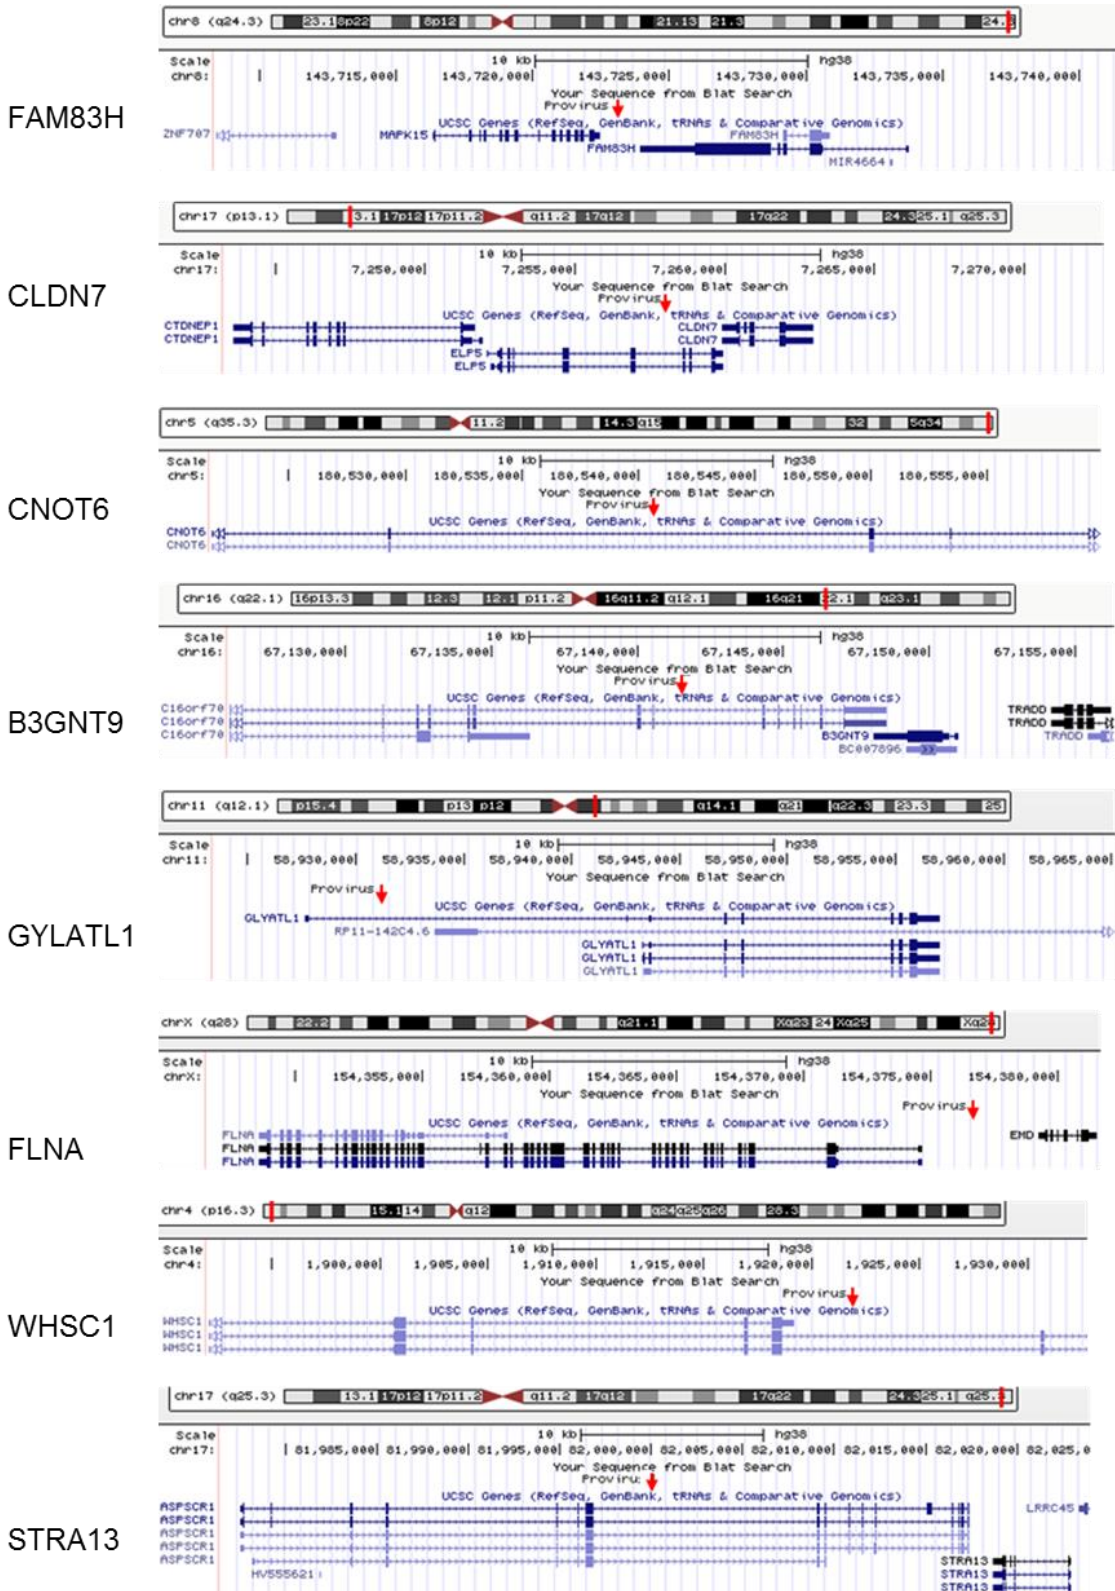



**Supplementary figure 4:** Genetic alterations in candidate genes in prostate cancer samples across six different datasets.

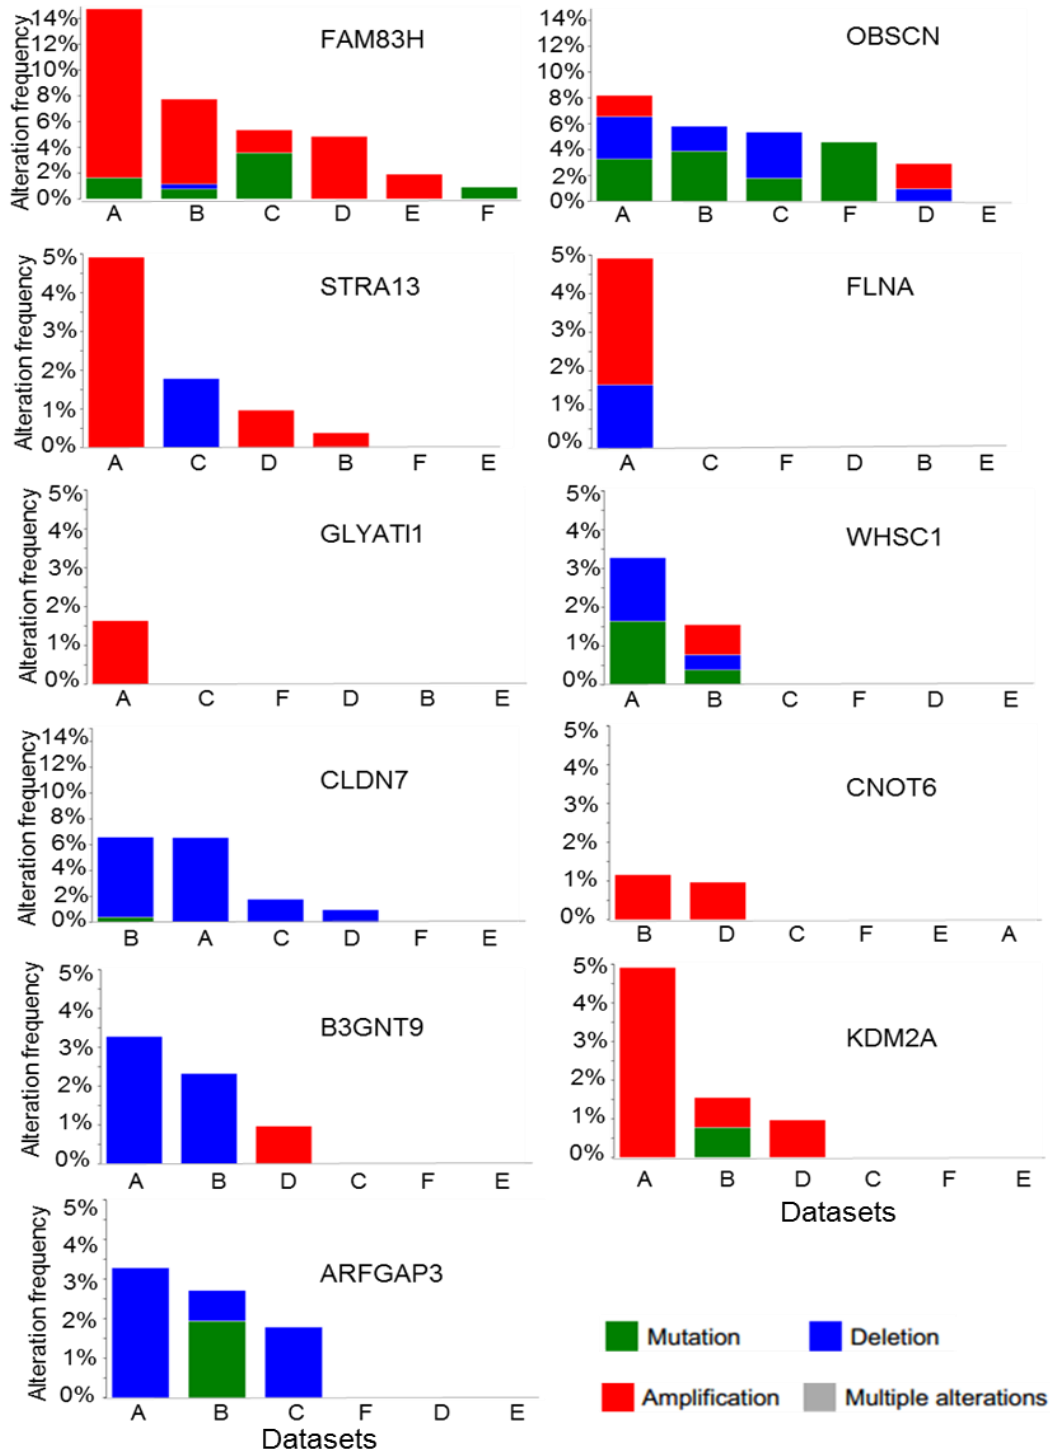

**A:** Grasso et al., Nature 2012; 487:239-243; **B:** TCGA, Provisional; **C:** Baca et al., Cell 2013, 153:666-677; **D:** Taylor et al., Cancer Cell 2010, 8:11-22; **E:** Hieronymus et al., PNAS 2014, 111:11139-11144; **F:** Barbieri et al., Nature Genetics 2012, 44:685-689.

**Supplementary figure 5:** RT-PCR analysis showing relative mRNA levels in LNCaP transduced with pTRIPZ LV shRNA vectors A) KDM2A, B) FAM83H, C) GLYATL1 D) STRA13 cultured in presence and absence of doxycycline.

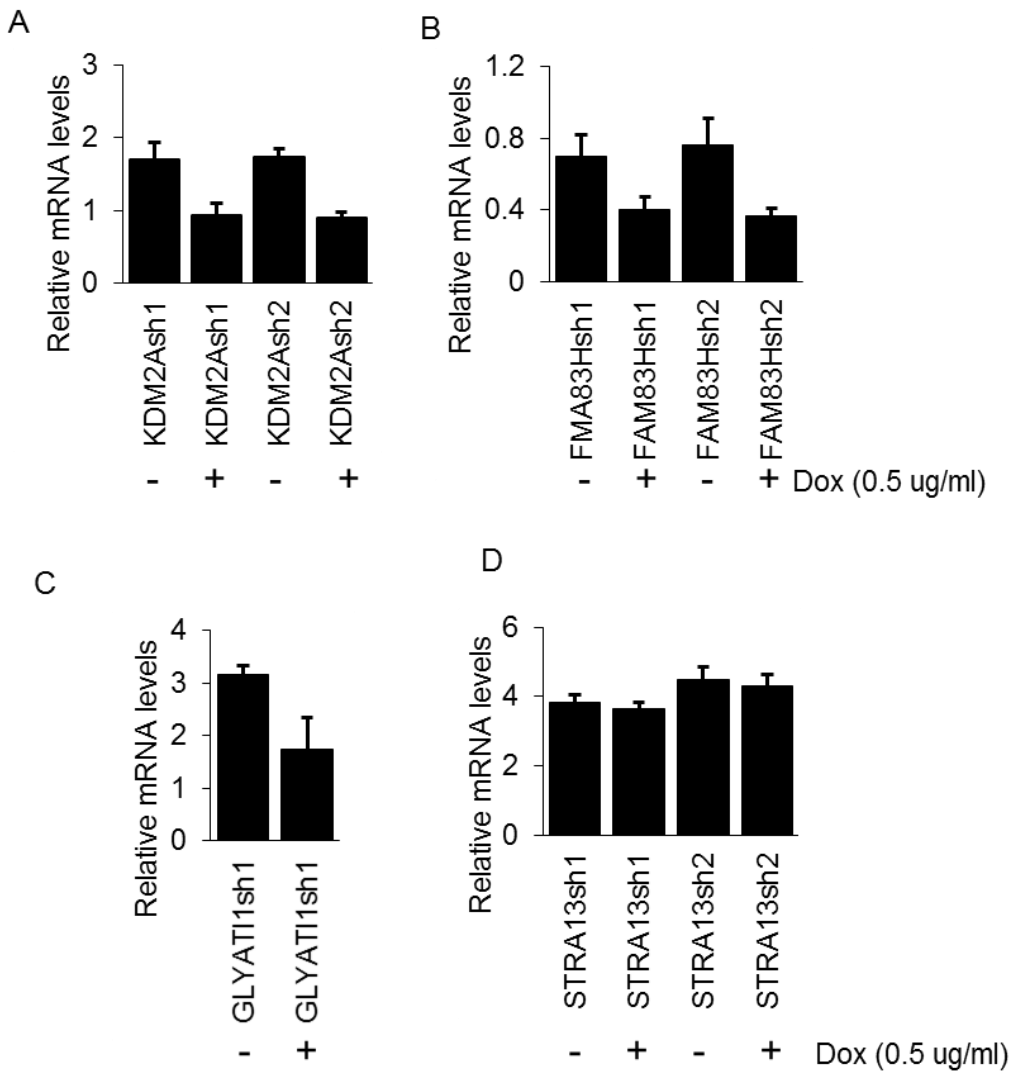

**Supplementary figure 6.** Kaplan-Meier curves showing the ability of the best four-gene combination to predict the recurrence risk in prostate cancer patients using cohorts from the datasets generated by Gulzar et al., (2013).

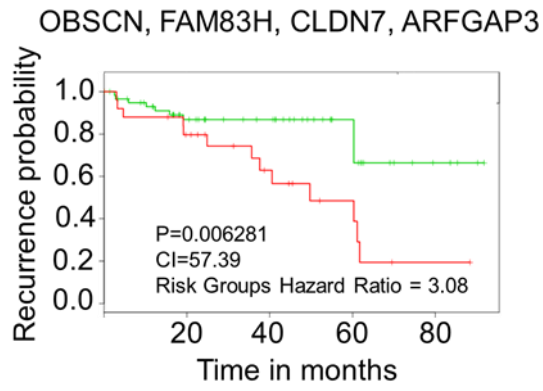

**Supplementary table 1:** Ability of the candidate genes (single, two-, three- and four gene combinations) to predict the recurrence risk in prostate cancer patients.

| <b>Gene combinations</b>          | <b>p-Value</b> | <b>Concordance Index</b> | <b>Risk groups hazard ratio</b> |
|-----------------------------------|----------------|--------------------------|---------------------------------|
| OBSCN + FAM83H + CLDN7 + ARFGAP3  | 0.00005302     | 74.37                    | 6.12                            |
| OBSCN + CLDN7 + B3GNT9 + ARFGAP3  | 0.00007988     | 75.14                    | 5.3                             |
| WHSC1 + CLDN7 + KDM2A + ARFGAP3   | 0.00008705     | 74.51                    | 5.24                            |
| OBSCN + CLDN7 + ARFGAP3           | 0.000101       | 74.78                    | 5.16                            |
| OBSCN + CLDN7 + CNOT6 + ARFGAP3   | 0.000101       | 74.81                    | 5.16                            |
| CLDN7 + ARFGAP3                   | 0.0001031      | 74.05                    | 5.16                            |
| FLNA + FAM83H + CLDN7 + CNOT6     | 0.0001047      | 74.92                    | 4.57                            |
| CLDN7 + CNOT6 + ARFGAP3           | 0.0001238      | 74.56                    | 5.06                            |
| FAM83H + CLDN7 + CNOT6 + ARFGAP3  | 0.0001238      | 74.43                    | 5.06                            |
| FAM83H + CLDN7                    | 0.00013        | 71.05                    | 4.63                            |
| WHSC1 + CLDN7 + B3GNT9 +KDM2A     | 0.0001587      | 75.65                    | 4.57                            |
| FLNA + FAM83H + CLDN7 + ARFGAP3   | 0.0001774      | 75.68                    | 4.53                            |
| OBSCN + STRA13 + CLDN7 + KDM2A    | 0.000183       | 71.05                    | 4.5                             |
| WHSC1 + CLDN7 + ARFGAP3           | 0.0001895      | 75.33                    | 4.48                            |
| OBSCN + WHSC1 + CLDN7 + ARFGAP3   | 0.0001895      | 75.41                    | 4.48                            |
| WHSC1 + CLDN7 + CNOT6 + ARFGAP3   | 0.0001895      | 75.49                    | 4.48                            |
| STRA13 + CLDN7 + B3GNT9 +ARFGAP3  | 0.0002058      | 74.56                    | 4.45                            |
| CLDN7 + CNOT6 + B3GNT9 + ARFGAP3  | 0.0002058      | 74.7                     | 4.45                            |
| CLDN7 + B3GNT9 + KDM2A + ARFGAP3  | 0.0002111      | 74.65                    | 4.44                            |
| STRA13 + CLDN7 + CNOT6 + ARFGAP3  | 0.0002268      | 74.46                    | 4.41                            |
| FLNA + WHSC1 + CLDN7 + ARFGAP3    | 0.000232       | 75.35                    | 4.16                            |
| CLDN7 + KDM2A                     | 0.0002321      | 70.7                     | 4.39                            |
| CLDN7 + CNOT6 + KDM2A + ARFGAP3   | 0.0002449      | 73.72                    | 4.37                            |
| GLYATL1 + CLDN7 + B3GNT9 + KDM2A  | 0.0002506      | 78.05                    | 4.13                            |
| CLDN7 + B3GNT9 + ARFGAP3          | 0.0002606      | 74.54                    | 4.35                            |
| FAM83H + CLDN7 + B3GNT9 + ARFGAP3 | 0.0002606      | 74.78                    | 4.35                            |
| FAM83H + WHSC1 + CLDN7 + ARFGAP3  | 0.0002688      | 75.03                    | 4.33                            |
| OBSCN + STRA13 + CLDN7 + ARFGAP3  | 0.0002706      | 74.65                    | 4.32                            |
| FAM83H + CLDN7 + ARFGAP3          | 0.0002901      | 74.1                     | 4.3                             |
| FLNA + STRA13 + CLDN7 + ARFGAP3   | 0.0003083      | 75.35                    | 4.04                            |
| FLNA + CLDN7 + KDM2A + ARFGAP3    | 0.0003083      | 75.52                    | 4.04                            |
| STRA13 + WHSC1 + CLDN7 + ARFGAP3  | 0.0003393      | 75.27                    | 3.99                            |
| FLNA + CLDN7 + B3GNT9 + ARFGAP3   | 0.0003457      | 76.61                    | 3.84                            |
| GLYATL1 + FLNA + STRA13 + CLDN7   | 0.0003556      | 78.05                    | 3.83                            |
| FLNA + CLDN7 + ARFGAP3            | 0.0003764      | 75.08                    | 3.96                            |
| GLYATL1 + FLNA + CLDN7 + CNOT6    | 0.0003765      | 78.3                     | 3.8                             |



|                                    |           |       |      |
|------------------------------------|-----------|-------|------|
| FLNA + WHSC1 + CLDN7 + B3GNT9      | 0.000383  | 75.76 | 3.78 |
| OBSCN + FLNA + CLDN7 + ARFGAP3     | 0.0003918 | 75.76 | 3.94 |
| STRA13 + FAM83H + CLDN7 + B3GNT9   | 0.0004035 | 72.14 | 3.92 |
| OBSCN + FAM83H + CLDN7 + KDM2A     | 0.0004132 | 70.89 | 3.91 |
| OBSCN + CLDN7 + KDM2A              | 0.0004348 | 71.02 | 3.89 |
| OBSCN + CLDN7 + CNOT6 + KDM2A      | 0.0004575 | 70.89 | 3.87 |
| GLYATL1 + CLDN7 + KDM2A + ARFGAP3  | 0.0004912 | 77.75 | 3.84 |
| GLYATL1 + STRA13 + CLDN7 + ARFGAP3 | 0.0004969 | 78.13 | 3.84 |
| WHSC1 + CLDN7 + KDM2A              | 0.0004976 | 72.09 | 3.83 |
| WHSC1 + CLDN7 + CNOT6 + KDM2A      | 0.0004976 | 72.19 | 3.89 |
| WHSC1 + CLDN7 + B3GNT9             | 0.0005185 | 74.89 | 3.83 |
| WHSC1 + CLDN7 + CNOT6 + B3GNT9     | 0.0005185 | 74.78 | 3.83 |
| FAM83H + CLDN7 + B3GNT9            | 0.00052   | 72.36 | 3.81 |
| OBSCN + FLNA                       | 0.000525  | 69.61 | 3.71 |
| STRA13 + CLDN7 + KDM2A             | 0.0005255 | 70.7  | 3.81 |
| STRA13 + WHSC1 + CLDN7 + KDM2A     | 0.0005546 | 72.39 | 3.79 |
| GLYATL1 + FLNA + CLDN7 + B3GNT9    | 0.0005799 | 79.22 | 3.54 |
| OBSCN + CLDN7 + CNOT6 + B3GNT9     | 0.0005827 | 72.88 | 3.77 |
| FLNA + STRA13 + CLDN7 + CNOT6      | 0.0005839 | 74.1  | 3.63 |
| FAM83H + CLDN7 + KDM2A             | 0.0005959 | 70.56 | 3.76 |
| STRA13 + FAM83H + CLDN7 + KDM2A    | 0.0005959 | 70.64 | 3.76 |
| FLNA + CLDN7 + CNOT6               | 0.0005991 | 74.07 | 3.61 |
| FLNA + CLDN7 + CNOT6 + KDM2A       | 0.0005991 | 74.07 | 3.61 |
| OBSCN + STRA13 + CLDN7 + B3GNT9    | 0.0006117 | 72.63 | 3.75 |
| OBSCN + FLNA + CLDN7 + KDM2A       | 0.0006671 | 74.21 | 3.57 |
| FLNA + WHSC1                       | 0.0006777 | 69.93 | 3.58 |
| OBSCN + FLNA + WHSC1               | 0.0006777 | 69.85 | 3.58 |
| OBSCN + CLDN7 + B3GNT9 + KDM2A     | 0.0006903 | 72.69 | 3.71 |
| OBSCN + WHSC1 + CLDN7 + B3GNT9     | 0.0006938 | 74.84 | 3.72 |
| GLYATL1 + WHSC1 + CLDN7 + B3GNT9   | 0.0007025 | 79.14 | 3.56 |
| FLNA + STRA13 + CLDN7 + B3GNT9     | 0.0007063 | 73.58 | 3.55 |
| FLNA + CLDN7 + CNOT6 + ARFGAP3     | 0.0007158 | 75.82 | 3.55 |
| CLDN7 + KDM2A + ARFGAP3            | 0.0007171 | 73.61 | 3.69 |
| OBSCN + CLDN7 + KDM2A + ARFGAP3    | 0.0007171 | 73.72 | 3.69 |
| OBSCN + FLNA + CLDN7               | 0.0007269 | 74.13 | 3.54 |
| OBSCN + FLNA + STRA13 + CLDN7      | 0.0007269 | 74.18 | 3.54 |
| OBSCN + FLNA + CLDN7 + CNOT6       | 0.0007269 | 74.46 | 3.54 |
| WHSC1 + CLDN7                      | 0.000746  | 71.6  | 3.68 |
| WHSC1 + FAM83H + CLDN7             | 0.000746  | 71.16 | 3.68 |
| GLYATL1 + FLNA + CLDN7 + KDM2A     | 0.000749  | 78.16 | 3.53 |
| STRA13 + FAM83H + CLDN7            | 0.0007541 | 71    | 3.52 |

|                                    |           |       |      |
|------------------------------------|-----------|-------|------|
| STRA13 + CLDN7 + ARFGAP3           | 0.0007541 | 74.21 | 3.67 |
| STRA13 + FAM83H + CLDN7 + ARFGAP3  | 0.0007541 | 74.07 | 3.67 |
| STRA13 + WHSC1 + CLDN7 + B3GNT9    | 0.0007576 | 75    | 3.68 |
| OBSCN + CLDN7 + B3GNT9             | 0.0007678 | 72.77 | 3.66 |
| OBSCN + FAM83H + CLDN7 + B3GNT9    | 0.0007678 | 73.15 | 3.66 |
| STRA13 + CLDN7 + B3GNT9 + KDM2A    | 0.0007755 | 72.96 | 3.66 |
| WHSC1 + CLDN7 + B3GNT9 + ARFGAP3   | 0.0008265 | 76.06 | 3.49 |
| GLYATL1 + STRA13 + CNOT6           | 0.0008312 | 71.13 | 3.49 |
| GLYATL1 + STRA13 + CNOT6 + B3GNT9  | 0.0008312 | 71.35 | 3.49 |
| CLDN7 + CNOT6 + B3GNT9             | 0.00085   | 72.66 | 3.47 |
| FLNA + WHSC1 + B3GNT9              | 0.0008809 | 72.09 | 3.41 |
| FLNA + STRA13 + WHSC1 + B3GNT9     | 0.0008809 | 72.03 | 3.41 |
| FLNA + WHSC1 + B3GNT9 + ARFGAP3    | 0.0008809 | 72.3  | 3.41 |
| FAM83H + WHSC1 + CLDN7 + KDM2A     | 0.0008866 | 72.28 | 0.36 |
| GLYATL1 + FLNA + FAM83H + CLDN7    | 0.0008873 | 76.69 | 3.39 |
| CLDN7 + B3GNT9 + KDM2A             | 0.0009393 | 72.82 | 3.59 |
| FAM83H + CLDN7 + B3GNT9 + KDM2A    | 0.0009393 | 72.74 | 3.59 |
| CLDN7 + CNOT6 + B3GNT9 + KDM2A     | 0.0009393 | 72.6  | 3.59 |
| GLYATL1 + WHSC1 + CLDN7 + KDM2A    | 0.0009606 | 77.12 | 3.43 |
| GLYATL1 + CLDN7 + B3GNT9 + ARFGAP3 | 0.0009673 | 78.27 | 3.44 |
| OBSCN + FLNA + STRA13 + KDM2A      | 0.001118  | 69.88 | 3.33 |
| GLYATL1 + STRA13                   | 0.001122  | 70.94 | 3.38 |
| GLYATL1 + STRA13 + WHSC1 + B3GNT9  | 0.001125  | 71.38 | 3.37 |
| OBSCN + FLNA + CLDN7 + B3GNT9      | 0.001139  | 75.57 | 3.28 |
| FLNA + WHSC1 + CLDN7               | 0.001145  | 73.26 | 3.37 |
| GLYATL1 + STRA13 + CLDN7 + B3GNT9  | 0.001174  | 76.12 | 3.37 |
| GLYATL1 + FAM83H + CLDN7 + KDM2A   | 0.001174  | 76.33 | 3.36 |
| OBSCN + WHSC1 + CLDN7 + KDM2A      | 0.00118   | 72.03 | 3.35 |
| FAM83H + CLDN7 + CNOT6 + B3GNT9    | 0.00121   | 72.69 | 3.35 |
| GLYATL1 + WHSC1 + KDM2A + ARFGAP4  | 0.001232  | 70.07 | 3.34 |
| OBSCN + FLNA + STRA13              | 0.001234  | 69.64 | 3.28 |
| STRA13 + CLDN7 + CNOT6             | 0.001276  | 72.11 | 3.33 |
| STRA13 + WHSC1 + CNOT6 + KDM2A     | 0.001292  | 65.66 | 3.33 |
| FLNA + FAM83H + WHSC1 + B3GNT9     | 0.001304  | 72.52 | 3.24 |
| FLNA + CLDN7 + CNOT6 + B3GNT9      | 0.00131   | 75.19 | 3.22 |
| GLYATL1 + FLNA + WHSC1 + CLDN7     | 0.001332  | 77.7  | 3.23 |
| OBSCN + FLNA + FAM83H + ARFGAP3    | 0.001342  | 70.32 | 3.24 |
| OBSCN + FLNA + FAM83H + CNOT6      | 0.001369  | 69.34 | 3.27 |
| FLNA + CLDN7 + B3GNT9              | 0.001386  | 73.91 | 3.22 |
| FLNA + FAM83H + CLDN7 + B3GNT9     | 0.001386  | 73.88 | 3.22 |
| GLYATL1 + WHSC1 + CLDN7 + ARFGAP3  | 0.001486  | 77.72 | 3.27 |

|                                    |          |       |      |
|------------------------------------|----------|-------|------|
| GLYATL1 + FAM83H + CLDN7 + ARFGAP3 | 0.001519 | 76.99 | 3.27 |
| GLYATL1 + FLNA + CLDN7             | 0.001524 | 77.7  | 3.18 |
| GLYATL1 + OBSCN + FLNA + CLDN7     | 0.001524 | 77.64 | 3.18 |
| FLNA + STRA13 + CNOT6              | 0.001535 | 69.25 | 3.2  |
| OBSCN + FLNA + STRA13 + CNOT6      | 0.001535 | 69.58 | 3.2  |
| FLNA + WHSC1 + CLDN7 + KDM2A       | 0.001565 | 73.86 | 3.25 |
| OBSCN + FLNA + STRA13 + FAM83H     | 0.001592 | 69.8  | 3.18 |
| OBSCN + STRA13 + FAM83H + CLDN7    | 0.001601 | 71.95 | 3.25 |
| FLNA + STRA13 + WHSC1 + KDM2A      | 0.00161  | 69.91 | 3.18 |
| FLNA + FAM83H + WHSC1 + CNOT6      | 0.001612 | 69.53 | 3.18 |
| GLYATL1 + WHSC1 + B3GNT9 + KDM2A   | 0.00164  | 71.54 | 3.23 |
| GLYATL1 + FLNA + CLDN7 + ARFGAP3   | 0.00167  | 78.81 | 3.14 |
| OBSCN + FLNA + CNOT6               | 0.001694 | 69.61 | 3.16 |
| FAM83H + WHSC1 + CLDN7 + B3GNT9    | 0.001698 | 75.05 | 3.24 |
| GLYATL1 + STRA13 + WHSC1 + CLDN7   | 0.001703 | 76.55 | 3.14 |
| OBSCN + FAM83H + WHSC1 + CLDN7     | 0.001728 | 71.38 | 3.22 |
| GLYATL1 + CLDN7 + ARFGAP3          | 0.00174  | 77.26 | 3.22 |
| FLNA + WHSC1 + CLDN7 + CNOT6       | 0.001749 | 74.26 | 3.12 |
| STRA13 + FAM83H + WHSC1 + CLDN7    | 0.001765 | 71.68 | 3.21 |
| FLNA + STRA13 + WHSC1 + CLDN7      | 0.001793 | 73.47 | 3.12 |
| OBSCN + FLNA + FAM83H + CLDN7      | 0.001799 | 74.62 | 3.12 |
| CLDN7 + CNOT6 + KDM2A              | 0.001801 | 70.83 | 3.2  |
| STRA13 + CLDN7 + CNOT6 + KDM2A     | 0.001801 | 70.75 | 3.2  |
| GLYATL1 + STRA13 + CNOT6 + ARFGAP3 | 0.001819 | 73.09 | 3.2  |
| FLNA + WHSC1 + KDM2A               | 0.001842 | 69.66 | 3.12 |
| OBSCN + CLDN7 + CNOT6              | 0.001874 | 71.79 | 3.19 |
| OBSCN + FAM83H + CLDN7 + CNOT6     | 0.001874 | 71.8  | 3.19 |
| GLYATL1 + FAM83H + WHSC1 + CLDN7   | 0.001895 | 76.14 | 3.1  |
| OBSCN + FLNA + FAM83H              | 0.001912 | 69.01 | 3.11 |
| STRA13 + WHSC1 + CLDN7             | 0.001934 | 72.09 | 3.19 |
| OBSCN + STRA13 + WHSC1 + CLDN7     | 0.001934 | 72.52 | 3.19 |
| GLYATL1 + OBSCN + CLDN7 + KDM2A    | 0.001983 | 76.39 | 3.17 |
| GLYATL1 + CLDN7 + CNOT6 + KDM2A    | 0.001983 | 76.47 | 3.17 |
| FLNA + CLDN7 + B3GNT9 + KDM2A      | 0.001997 | 74.89 | 3.08 |
| OBSCN + FLNA + WHSC1 + KDM2A       | 0.002003 | 69.58 | 3.09 |
| OBSCN + STRA13 + CLDN7             | 0.002011 | 72.03 | 3.17 |
| GLYATL1 + CLDN7 + CNOT6 + B3GNT9   | 0.002045 | 76.39 | 3.08 |
| GLYATL1 + CLDN7 + CNOT6 + ARFGAP3  | 0.002051 | 77.15 | 3.16 |
| WHSC1 + CLDN7 + CNOT6              | 0.002116 | 72.28 | 3.15 |
| OBSCN + WHSC1 + CLDN7 + CNOT6      | 0.002116 | 72.39 | 3.15 |
| GLYATL1 + CLDN7 + KDM2A            | 0.002139 | 76.63 | 3.14 |

|                                     |          |       |      |
|-------------------------------------|----------|-------|------|
| GLYATL1 + STRA13 + CLDN7 + KDM2A    | 0.002139 | 76.82 | 3.14 |
| OBSCN + FLNA + FAM83H + KDM2A       | 0.0022   | 69.25 | 3.06 |
| FLNA + CLDN7 + KDM2A                | 0.002315 | 73.75 | 3.03 |
| FLNA + STRA13 + CLDN7 + KDM2A       | 0.002315 | 73.83 | 3.03 |
| FLNA + FAM83H + CLDN7 + KDM2A       | 0.002315 | 73.64 | 3.03 |
| FLNA + STRA13                       | 0.002333 | 69.47 | 3.06 |
| FLNA + WHSC1 + B3GNT9 + KDM2A       | 0.002354 | 71.9  | 3    |
| FLNA + FAM83H + KDM2A               | 0.002355 | 68.38 | 3.05 |
| FLNA + WHSC1 + CNOT6                | 0.00236  | 69.69 | 3.03 |
| OBSCN + FLNA + WHSC1 + CNOT6        | 0.00236  | 69.61 | 3.03 |
| STRA13 + CLDN7 + KDM2A + ARFGAP3    | 0.002362 | 73.86 | 3.11 |
| OBSCN + FLNA + WHSC1 + CLDN7        | 0.002368 | 73.64 | 3.02 |
| GLYATL1 + STRA13 + WHSC1 + KDM2A    | 0.002384 | 69.99 | 3.1  |
| FLNA + FAM83H                       | 0.002494 | 68.19 | 3.03 |
| GLYATL1 + FAM83H + CLDN7 + B3GNT9   | 0.002507 | 76.06 | 3.01 |
| FLNA                                | 0.002583 | 68.36 | 3.02 |
| FLNA + KDM2A                        | 0.002583 | 68.33 | 3.02 |
| FLNA + CNOT6 + B3GNT9               | 0.002597 | 70.29 | 3    |
| FLNA + CNOT6 + B3GNT9 + KDM2A       | 0.002597 | 70.34 | 3    |
| GLYATL1 + OBSCN + WHSC1 + CLDN7     | 0.002632 | 76.42 | 2.98 |
| GLYATL1 + STRA13 + FAM83H + CNOT6   | 0.00289  | 70.97 | 2.95 |
| GLYATL1 + FAM83H + WHSC1 + B3GNT9   | 0.002944 | 70.86 | 2.95 |
| GLYATL1 + STRA13 + CLDN7            | 0.002996 | 75.87 | 2.95 |
| OBSCN + FAM83H + CLDN7              | 0.003002 | 71.6  | 3.03 |
| FLNA + STRA13 + CLDN7               | 0.00304  | 72.6  | 2.93 |
| GLYATL1 + FAM83H + B3GNT9 + ARFGAP3 | 0.003067 | 68.87 | 2.93 |
| FAM83H + CLDN7 + KDM2A + ARFGAP3    | 0.003085 | 73.37 | 3.01 |
| FLNA + FAM83H + ARFGAP3             | 0.003087 | 69.69 | 2.91 |
| FLNA + STRA13 + KDM2A               | 0.003129 | 69.5  | 2.94 |
| GLYATL1 + CLDN7 + B3GNT9            | 0.003239 | 75.41 | 2.93 |
| OBSCN + FLNA + KDM2A                | 0.003286 | 69.53 | 2.89 |
| GLYATL1 + STRA13 + FAM83H + ARFGAP3 | 0.0033   | 71.54 | 2.91 |
| GLYATL1 + OBSCN + STRA13 + ARFGAP3  | 0.003302 | 71.49 | 2.91 |
| STRA13 + FAM83H + CLDN7 + CNOT6     | 0.003325 | 71.9  | 2.9  |
| GLYATL1 + CNOT6 + ARFGAP3           | 0.003426 | 69.14 | 2.9  |
| GLYATL1 + OBSCN + WHSC1 + KDM2A     | 0.003501 | 69.99 | 2.88 |
| FLNA + WHSC1 + ARFGAP3              | 0.00351  | 70.62 | 2.84 |
| GLYATL1 + OBSCN + CLDN7 + B3GNT9    | 0.003561 | 76.44 | 2.89 |
| STRA13 + CLDN7 + CNOT6 + B3GNT9     | 0.003567 | 72.52 | 2.88 |
| GLYATL1 + B3GNT9 + ARFGAP3          | 0.0036   | 68.79 | 2.88 |
| GLYATL1 + WHSC1 + B3GNT9            | 0.003623 | 70.78 | 2.87 |

|                                     |          |       |      |
|-------------------------------------|----------|-------|------|
| GLYATL1 + STRA13 + FAM83H           | 0.003748 | 70.75 | 2.86 |
| GLYATL1 + STRA13 + B3GNT9           | 0.003748 | 71.08 | 2.86 |
| GLYATL1 + STRA13 + FAM83H + B3GNT9  | 0.003748 | 70.92 | 2.86 |
| FLNA + B3GNT9 + KDM2A               | 0.003789 | 70.23 | 2.84 |
| FLNA + STRA13 + B3GNT9 + KDM2A      | 0.003789 | 70.26 | 2.84 |
| FLNA + FAM83H + CNOT6 + ARFGAP3     | 0.003858 | 69.66 | 2.84 |
| GLYATL1 + FLNA + FAM83H + CNOT6     | 0.003889 | 70.53 | 2.84 |
| FLNA + STRA13 + WHSC1 + ARFGAP3     | 0.003947 | 70.56 | 2.81 |
| FAM83H + CLDN7 + CNOT6              | 0.00395  | 71.7  | 2.85 |
| FLNA + ARFGAP3                      | 0.004    | 69.99 | 2.82 |
| GLYATL1 + WHSC1 + CNOT6 + B3GNT9    | 0.004007 | 70.7  | 2.84 |
| WHSC1 + CNOT6 + B3GNT9 + KDM2A      | 0.004007 | 67.51 | 2.84 |
| OBSCN + FLNA + WHSC1 + ARFGAP3      | 0.004039 | 70.59 | 2.8  |
| FLNA + WHSC1 + CNOT6 + B3GNT9       | 0.004051 | 71.79 | 2.8  |
| GLYATL1 + OBSCN + STRA13 + B3GNT9   | 0.004118 | 70.67 | 2.83 |
| FLNA + CLDN7                        | 0.004151 | 72.3  | 2.83 |
| GLYATL1 + FAM83H + CLDN7            | 0.004167 | 74.37 | 2.83 |
| OBSCN + FLNA + ARFGAP3              | 0.004294 | 69.99 | 2.79 |
| OBSCN + FLNA + CNOT6 + ARFGAP3      | 0.004294 | 69.99 | 2.79 |
| FLNA + FAM83H + CNOT6 + B3GNT9      | 0.004329 | 69.91 | 2.81 |
| CLDN7 + CNOT6                       | 0.004405 | 71.73 | 2.81 |
| FLNA + FAM83H + KDM2A + ARFGAP3     | 0.004462 | 69.69 | 2.77 |
| STRA13 + WHSC1 + CLDN7 + CNOT6      | 0.004517 | 72.6  | 2.8  |
| FLNA + STRA13 + FAM83H + CNOT6      | 0.004554 | 69.74 | 2.77 |
| GLYATL1 + WHSC1 + CNOT6 + KDM2A     | 0.004635 | 68.57 | 2.79 |
| GLYATL1 + ARFGAP3                   | 0.004637 | 68.3  | 2.79 |
| GLYATL1 + OBSCN + ARFGAP3           | 0.004637 | 68.55 | 2.79 |
| GLYATL1 + FAM83H + ARFGAP3          | 0.004637 | 68.27 | 2.79 |
| FLNA + STRA13 + KDM2A + ARFGAP3     | 0.004676 | 70.62 | 2.75 |
| FLNA + STRA13 + WHSC1               | 0.004682 | 69.8  | 2.74 |
| FLNA + STRA13 + WHSC1 + CNOT6       | 0.004682 | 69.83 | 2.74 |
| FLNA + FAM83H + CNOT6               | 0.004758 | 68.71 | 2.76 |
| FLNA + STRA13 + FAM83H + ARFGAP3    | 0.004777 | 70.18 | 2.75 |
| GLYATL1 + STRA13 + ARFGAP3          | 0.004809 | 70.78 | 2.78 |
| GLYATL1 + STRA13 + B3GNT9 + ARFGAP3 | 0.004809 | 70.86 | 2.78 |
| GLYATL1 + OBSCN + KDM2A + ARFGAP4   | 0.004844 | 67.89 | 2.78 |
| OBSCN + STRA13 + CLDN7 + CNOT6      | 0.004934 | 72    | 2.77 |
| GLYATL1 + FLNA + WHSC1 + B3GNT9     | 0.005072 | 74.4  | 2.73 |
| FAM83H + CLDN7 + CNOT6 + KDM2A      | 0.005089 | 70.78 | 2.76 |
| OBSCN + FLNA + STRA13 + WHSC1       | 0.005122 | 69.72 | 2.72 |
| GLYATL1 + WHSC1 + ARFGAP3           | 0.005143 | 69.91 | 2.76 |

|                                    |          |       |      |
|------------------------------------|----------|-------|------|
| FLNA + FAM83H + CNOT6 + KDM2A      | 0.005143 | 68.63 | 2.74 |
| FLNA + WHSC1 + CNOT6 + KDM2A       | 0.005296 | 69.74 | 2.71 |
| GLYATL1 + FLNA + STRA13 + B3GNT9   | 0.00532  | 74.02 | 2.72 |
| FLNA + STRA13 + ARFGAP3            | 0.005331 | 70.67 | 2.71 |
| OBSCN + FLNA + STRA13 + ARFGAP3    | 0.005331 | 70.67 | 2.71 |
| GLYATL1 + OBSCN + FAM83H + ARFGAP3 | 0.005425 | 68.55 | 2.74 |
| GLYATL1 + OBSCN + CLDN7 + ARFGAP3  | 0.005507 | 77.21 | 2.74 |
| FLNA + STRA13 + FAM83H + WHSC1     | 0.005669 | 70.45 | 2.69 |
| GLYATL1 + B3GNT9 + KDM2A           | 0.005809 | 68.11 | 2.72 |
| FLNA + CNOT6                       | 0.005816 | 69.01 | 2.69 |
| GLYATL1 + OBSCN + B3GNT9 + KDM2A   | 0.005937 | 68.16 | 2.72 |
| GLYATL1 + B3GNT9 + KDM2A + ARFGAP3 | 0.00597  | 69.13 | 2.71 |
| OBSCN + FLNA + FAM83H + WHSC1      | 0.006015 | 69.09 | 2.66 |
| OBSCN + WHSC1 + CLDN7              | 0.006231 | 71.7  | 2.7  |
| GLYATL1 + STRA13 + FAM83H + WHSC1  | 0.006322 | 71.21 | 2.64 |
| FLNA + CNOT6 + KDM2A               | 0.006354 | 68.95 | 2.66 |
| GLYATL1 + OBSCN + STRA13 + CLDN7   | 0.006421 | 76.06 | 2.64 |
| GLYATL1 + WHSC1 + CLDN7            | 0.006612 | 76.63 | 2.62 |
| GLYATL1 + OBSCN + STRA13 + CNOT6   | 0.00671  | 70.32 | 2.62 |
| OBSCN + CLDN7                      | 0.006813 | 71.19 | 2.67 |
| FLNA + STRA13 + FAM83H             | 0.007044 | 69.42 | 2.62 |
| FLNA + STRA13 + FAM83H + KDM2A     | 0.007044 | 69.42 | 2.62 |
| FLNA + B3GNT9                      | 0.007048 | 69.99 | 2.62 |
| FLNA + FAM83H + WHSC1 + ARFGAP3    | 0.007075 | 70.59 | 2.61 |
| GLYATL1 + STRA13 + WHSC1 + CNOT6   | 0.007085 | 71.35 | 2.6  |
| OBSCN + WHSC1 + KDM2A              | 0.007177 | 64.71 | 2.65 |
| OBSCN + WHSC1 + CNOT6 + KDM2A      | 0.007589 | 65.36 | 2.63 |
| GLYATL1 + WHSC1 + CLDN7 + CNOT6    | 0.007696 | 76.5  | 2.58 |
| STRA13 + CNOT6 + ARFGAP3           | 0.007809 | 67.13 | 2.62 |
| FLNA + STRA13 + B3GNT9             | 0.007872 | 69.93 | 2.56 |
| FLNA + STRA13 + CNOT6 + B3GNT9     | 0.007872 | 70.32 | 2.56 |
| OBSCN + FLNA + B3GNT9              | 0.008032 | 70.64 | 2.56 |
| OBSCN + FLNA + STRA13 + B3GNT9     | 0.008032 | 70.72 | 2.56 |
| OBSCN + FLNA + CNOT6 + B3GNT9      | 0.008032 | 70.59 | 2.56 |
| OBSCN + FLNA + B3GNT9 + KDM2A      | 0.008032 | 70.75 | 2.56 |
| FLNA + STRA13 + FAM83H + CLDN7     | 0.008161 | 72.77 | 2.56 |
| GLYATL1 + STRA13 + FAM83H + CLDN7  | 0.008374 | 76.03 | 2.56 |
| GLYATL1 + FAM83H + CLDN7 + CNOT6   | 0.008471 | 75.16 | 2.55 |
| FLNA + FAM83H + CLDN7              | 0.008498 | 72.47 | 2.54 |
| GLYATL1 + FLNA + STRA13            | 0.00852  | 72.36 | 2.52 |
| GLYATL1 + FLNA + STRA13 + WHSC1    | 0.00852  | 72.41 | 2.52 |

|                                    |          |       |      |
|------------------------------------|----------|-------|------|
| GLYATL1 + FAM83H + WHSC1 + KDM2A   | 0.008571 | 69.77 | 2.54 |
| GLYATL1 + CLDN7 + CNOT6            | 0.008593 | 75.3  | 2.54 |
| GLYATL1 + CNOT6 + B3GNT9 + ARFGAP3 | 0.008642 | 68.79 | 2.55 |
| GLYATL1 + STRA13 + WHSC1           | 0.008678 | 70.81 | 2.53 |
| OBSCN + FLNA + CNOT6 + KDM2A       | 0.008703 | 69.14 | 2.53 |
| GLYATL1 + FLNA + STRA13 + CNOT6    | 0.008814 | 72.19 | 2.51 |
| GLYATL1 + FLNA + STRA13 + ARFGAP3  | 0.008814 | 72.39 | 2.51 |
| GLYATL1 + OBSCN + STRA13 + WHSC1   | 0.008911 | 71.87 | 2.53 |
| FLNA + CNOT6 + ARFGAP3             | 0.008929 | 69.91 | 2.53 |
| OBSCN + STRA13 + KDM2A + ARFGAP3   | 0.008982 | 66.01 | 2.58 |
| FAM83H + WHSC1 + B3GNT9 + KDM2A    | 0.009096 | 67.51 | 2.53 |
| GLYATL1 + FLNA + STRA13 + FAM83H   | 0.009178 | 71.35 | 2.51 |
| FLNA + WHSC1 + CNOT6 + ARFGAP3     | 0.009708 | 70.53 | 2.48 |
| OBSCN + ARFGAP3                    | 0.009716 | 63.37 | 2.55 |
| OBSCN + STRA13 + CNOT6 + B3GNT9    | 0.009851 | 64.13 | 2.5  |
| OBSCN + FAM83H + ARFGAP3           | 0.009929 | 63.53 | 2.54 |
| STRA13 + FAM83H + WHSC1 + ARFGAP3  | 0.01006  | 66.45 | 2.49 |
| FLNA + WHSC1 + KDM2A + ARFGAP3     | 0.01017  | 70.72 | 2.47 |
| OBSCN + STRA13 + WHSC1 + CNOT6     | 0.01018  | 64.9  | 2.49 |
| OBSCN + STRA13 + FAM83H + B3GNT9   | 0.01056  | 64.3  | 2.48 |
| FLNA + STRA13 + FAM83H + B3GNT9    | 0.01062  | 69.83 | 2.47 |
| OBSCN + FLNA + KDM2A + ARFGAP3     | 0.01066  | 70.45 | 2.45 |
| GLYATL1 + FLNA + FAM83H + B3GNT9   | 0.01088  | 73.01 | 2.45 |
| GLYATL1 + OBSCN + B3GNT9 + ARFGAP3 | 0.01114  | 69.14 | 2.46 |
| GLYATL1 + OBSCN + FLNA + STRA13    | 0.01132  | 72.3  | 2.44 |
| OBSCN + FLNA + FAM83H + B3GNT9     | 0.01132  | 70.04 | 2.44 |
| GLYATL1 + FAM83H + WHSC1 + ARFGAP3 | 0.01152  | 69.88 | 2.45 |
| FLNA + STRA13 + CNOT6 + ARFGAP3    | 0.01155  | 70.59 | 2.43 |
| GLYATL1 + WHSC1 + B3GNT9 + ARFGAP3 | 0.0117   | 71.08 | 2.44 |
| GLYATL1 + OBSCN + CNOT6 + ARFGAP3  | 0.01186  | 68.85 | 2.44 |
| FLNA + STRA13 + CNOT6 + KDM2A      | 0.0122   | 69.44 | 2.41 |
| FAM83H + WHSC1 + CLDN7 + CNOT6     | 0.01239  | 71.98 | 2.43 |
| GLYATL1 + OBSCN + STRA13 + FAM83H  | 0.01245  | 70.37 | 2.42 |
| GLYATL1 + OBSCN + B3GNT9           | 0.0126   | 67.02 | 2.42 |
| GLYATL1 + OBSCN + WHSC1 + CNOT6    | 0.01271  | 68.98 | 2.42 |
| GLYATL1 + FLNA + FAM83H + KDM2A    | 0.0129   | 69.83 | 2.39 |
| STRA13 + CNOT6 + KDM2A + ARFGAP3   | 0.01293  | 66.09 | 2.42 |
| GLYATL1 + STRA13 + FAM83H + KDM2A  | 0.01304  | 66.39 | 2.41 |
| GLYATL1 + OBSCN + WHSC1 + B3GNT9   | 0.01323  | 71.35 | 2.4  |
| OBSCN + STRA13 + WHSC1 + KDM2A     | 0.01323  | 64.68 | 2.41 |
| FLNA + CNOT6 + KDM2A + ARFGAP3     | 0.01323  | 70.07 | 2.39 |

|                                    |         |       |      |
|------------------------------------|---------|-------|------|
| GLYATL1 + OBSCN + STRA13           | 0.01332 | 70.18 | 2.4  |
| FLNA + KDM2A + ARFGAP3             | 0.0136  | 70.04 | 2.38 |
| GLYATL1 + OBSCN + WHSC1            | 0.01361 | 69.2  | 2.39 |
| GLYATL1 + WHSC1 + KDM2A            | 0.01362 | 68.95 | 2.39 |
| GLYATL1 + OBSCN + CNOT6 + B3GNT9   | 0.01365 | 66.91 | 2.4  |
| GLYATL1 + CNOT6 + KDM2A            | 0.01366 | 64.49 | 2.4  |
| GLYATL1 + OBSCN + CNOT6 + KDM2A    | 0.01366 | 64.49 | 2.4  |
| STRA13 + CLDN7 + B3GNT9            | 0.01397 | 70.67 | 2.39 |
| GLYATL1 + OBSCN + KDM2A            | 0.0141  | 64.43 | 2.39 |
| GLYATL1 + STRA13 + WHSC1 + ARFGAP3 | 0.01414 | 70.67 | 2.38 |
| GLYATL1 + CNOT6 + B3GNT9 + KDM2A   | 0.01475 | 67.57 | 2.37 |
| GLYATL1 + KDM2A + ARFGAP3          | 0.01502 | 67.54 | 2.37 |
| FLNA + FAM83H + WHSC1              | 0.01509 | 69.25 | 2.34 |
| FLNA + FAM83H + WHSC1 + KDM2A      | 0.01509 | 69.14 | 2.34 |
| GLYATL1 + FLNA + B3GNT9 + KDM2A    | 0.01511 | 73.5  | 2.36 |
| GLYATL1 + STRA13 + B3GNT9 + KDM2A  | 0.01534 | 68.71 | 2.36 |
| FAM83H + WHSC1 + KDM2A + ARFGAP3   | 0.01573 | 65.93 | 2.35 |
| GLYATL1 + FLNA + B3GNT9            | 0.01576 | 73.91 | 2.35 |
| GLYATL1 + OBSCN + FLNA + B3GNT9    | 0.01586 | 73.18 | 2.35 |
| GLYATL1 + FLNA + B3GNT9 + ARFGAP3  | 0.01627 | 73.42 | 2.34 |
| STRA13 + CLDN7                     | 0.01664 | 69.47 | 2.34 |
| OBSCN + WHSC1 + B3GNT9 + KDM2A     | 0.01722 | 67.05 | 2.3  |
| GLYATL1 + FAM83H + B3GNT9          | 0.01744 | 67.95 | 2.32 |
| GLYATL1 + OBSCN + FAM83H + B3GNT9  | 0.01744 | 67.4  | 2.32 |
| GLYATL1 + FLNA + FAM83H + ARFGAP3  | 0.01747 | 70.59 | 2.3  |
| OBSCN + CNOT6 + B3GNT9 + KDM2A     | 0.01757 | 63.21 | 2.32 |
| STRA13 + B3GNT9 + KDM2A            | 0.01798 | 63.4  | 2.31 |
| GLYATL1 + FAM83H + CNOT6 + ARFGAP3 | 0.01802 | 69.83 | 2.31 |
| OBSCN + STRA13 + B3GNT9 + KDM2A    | 0.01865 | 63.37 | 2.3  |
| WHSC1 + CNOT6 + KDM2A              | 0.01933 | 65.09 | 2.29 |
| GLYATL1 + FAM83H + B3GNT9 + KDM2A  | 0.01971 | 66.48 | 2.28 |
| CLDN7 + B3GNT9                     | 0.01988 | 69.01 | 2.28 |
| GLYATL1 + STRA13 + KDM2A + ARFGAP3 | 0.02048 | 69.96 | 2.27 |
| FAM83H + CNOT6 + B3GNT9 + KDM2A    | 0.02064 | 62.66 | 2.25 |
| FLNA + FAM83H + B3GNT9             | 0.02072 | 69.42 | 2.26 |
| GLYATL1 + FLNA + CNOT6 + B3GNT9    | 0.02132 | 73.39 | 2.23 |
| GLYATL1 + STRA13 + CLDN7 + CNOT6   | 0.02179 | 76.03 | 2.23 |
| FLNA + B3GNT9 + ARFGAP3            | 0.02261 | 71.05 | 2.21 |
| OBSCN + FLNA + B3GNT9 + ARFGAP3    | 0.02261 | 71.32 | 2.21 |
| GLYATL1 + FLNA + KDM2A + ARFGAP3   | 0.02317 | 71.49 | 2.2  |
| FLNA + CNOT6 + B3GNT9 + ARFGAP3    | 0.02348 | 71.24 | 2.2  |



|                                    |         |       |      |
|------------------------------------|---------|-------|------|
| FLNA + B3GNT9 + KDM2A + ARFGAP3    | 0.02348 | 71.05 | 2.2  |
| GLYATL1 + FLNA + WHSC1 + KDM2A     | 0.02359 | 71.6  | 2.19 |
| STRA13 + FAM83H + KDM2A + ARFGAP3  | 0.02368 | 65.8  | 2.23 |
| FLNA + FAM83H + B3GNT9 + KDM2A     | 0.02373 | 69.39 | 2.2  |
| GLYATL1 + FLNA + STRA13 + KDM2A    | 0.02381 | 72.55 | 2.19 |
| STRA13 + KDM2A + ARFGAP3           | 0.02396 | 65.85 | 2.22 |
| OBSCN + STRA13 + B3GNT9            | 0.02399 | 64.27 | 2.2  |
| OBSCN + CNOT6 + ARFGAP3            | 0.02409 | 64.16 | 2.22 |
| KDM2A+ARFGAP3                      | 0.0242  | 63.86 | 2.22 |
| GLYATL1 + OBSCN + STRA13 + KDM2A   | 0.02424 | 67.62 | 2.19 |
| GLYATL1 + CNOT6 + KDM2A + ARFGAP3  | 0.02495 | 67.18 | 2.18 |
| OBSCN + KDM2A + ARFGAP3            | 0.02554 | 63.59 | 2.21 |
| OBSCN + FLNA + WHSC1 + B3GNT9      | 0.0258  | 71.38 | 2.16 |
| OBSCN + STRA13                     | 0.02636 | 63.83 | 2.17 |
| GLYATL1 + FLNA + CNOT6 + KDM2A     | 0.02693 | 71.41 | 2.15 |
| STRA13 + WHSC1 + B3GNT9 + ARFGAP3  | 0.02709 | 67.67 | 2.16 |
| CNOT6 + ARFGAP3                    | 0.02717 | 63.34 | 2.19 |
| OBSCN + STRA13 + FAM83H + CNOT6    | 0.02733 | 63.81 | 2.16 |
| STRA13 + FAM83H + WHSC1 + KDM2A    | 0.02739 | 65.55 | 2.16 |
| WHSC1 + B3GNT9 + KDM2A + ARFGAP3   | 0.0275  | 67.37 | 2.15 |
| ARFGAP3                            | 0.02764 | 63.34 | 2.18 |
| STRA13 + WHSC1 + CNOT6             | 0.02765 | 65.09 | 2.15 |
| GLYATL1 + FLNA                     | 0.0278  | 71.54 | 2.14 |
| GLYATL1 + FLNA + WHSC1             | 0.0278  | 71.62 | 2.14 |
| GLYATL1 + FLNA + CNOT6             | 0.0278  | 71.19 | 2.14 |
| GLYATL1 + FLNA + ARFGAP3           | 0.0278  | 71.41 | 2.14 |
| GLYATL1 + FLNA + WHSC1 + ARFGAP3   | 0.0278  | 71.35 | 2.14 |
| GLYATL1 + FLNA + CNOT6 + ARFGAP3   | 0.0278  | 71.27 | 2.14 |
| FLNA + FAM83H + B3GNT9 + ARFGAP3   | 0.02795 | 71.38 | 2.14 |
| B3GNT9 + ARFGAP3                   | 0.02874 | 62.85 | 2.17 |
| GLYATL1 + FLNA + KDM2A             | 0.02879 | 71.41 | 2.13 |
| OBSCN + CNOT6 + B3GNT9 + ARFGAP3   | 0.02909 | 64.27 | 2.16 |
| GLYATL1 + OBSCN + FAM83H + WHSC1   | 0.02911 | 69.17 | 2.13 |
| GLYATL1 + OBSCN + FAM83H + CNOT6   | 0.02917 | 65.8  | 2.14 |
| B3GNT9 + KDM2A                     | 0.03016 | 62.85 | 2.13 |
| GLYATL1 + WHSC1                    | 0.03048 | 69.04 | 2.12 |
| GLYATL1 + WHSC1 + CNOT6            | 0.03097 | 68.65 | 2.12 |
| GLYATL1 + FAM83H + KDM2A + ARFGAP3 | 0.03139 | 66.34 | 2.11 |
| WHSC1 + CNOT6 + KDM2A + ARFGAP3    | 0.03168 | 65.28 | 2.11 |
| GLYATL1 + OBSCN + FLNA             | 0.03183 | 71.27 | 2.1  |
| GLYATL1 + OBSCN + FLNA + CNOT6     | 0.03183 | 71.38 | 2.1  |

|                                   |         |       |      |
|-----------------------------------|---------|-------|------|
| GLYATL1 + OBSCN + FLNA + KDM2A    | 0.03183 | 71.32 | 2.1  |
| GLYATL1 + OBSCN + FLNA + ARFGAP3  | 0.03183 | 71.46 | 2.1  |
| GLYATL1 + OBSCN + FAM83H          | 0.0326  | 66.04 | 2.1  |
| GLYATL1 + STRA13 + CNOT6 + KDM2A  | 0.0331  | 66.75 | 2.1  |
| WHSC1 + FAM83H + KDM2A            | 0.03356 | 64.38 | 2.09 |
| GLYATL1 + KDM2A                   | 0.03432 | 65.03 | 2.09 |
| GLYATL1 + OBSCN + FLNA + WHSC1    | 0.03629 | 71.51 | 2.06 |
| GLYATL1                           | 0.03653 | 64.62 | 2.07 |
| WHSC1 + FAM83H + ARFGAP3          | 0.03707 | 64.87 | 2.06 |
| OBSCN + FAM83H + WHSC1 + KDM2A    | 0.03717 | 64.3  | 2.06 |
| FAM83H + WHSC1 + CNOT6 + ARFGAP3  | 0.03774 | 64.92 | 2.06 |
| OBSCN + STRA13 + CNOT6 + ARFGAP3  | 0.0387  | 67.05 | 2.05 |
| GLYATL1 + FLNA + FAM83H           | 0.03911 | 69.55 | 2.04 |
| GLYATL1 + B3GNT9                  | 0.03935 | 66.86 | 2.05 |
| STRA13 + FAM83H + B3GNT9 + KDM2A  | 0.03974 | 63.07 | 2.05 |
| GLYATL1 + STRA13 + KDM2A          | 0.04003 | 67.43 | 2.04 |
| OBSCN + FAM83H + WHSC1 + ARFGAP3  | 0.0402  | 64.84 | 2.04 |
| GLYATL1 + OBSCN + WHSC1 + ARFGAP3 | 0.04023 | 71.43 | 2.04 |
| STRA13 + WHSC1 + KDM2A            | 0.04041 | 64.24 | 2.04 |
| FAM83H + WHSC1 + CNOT6 + KDM2A    | 0.04072 | 64.71 | 2.04 |
| GLYATL1 + FLNA + FAM83H + WHSC1   | 0.04123 | 69.85 | 2.02 |
| OBSCN + B3GNT9 + KDM2A + ARFGAP3  | 0.04183 | 65.06 | 2.03 |
| FAM83H + B3GNT9 + KDM2A + ARFGAP3 | 0.04198 | 64.6  | 2.03 |
| OBSCN + B3GNT9 + ARFGAP3          | 0.04203 | 63.02 | 2.03 |
| OBSCN + FAM83H + B3GNT9 + ARFGAP3 | 0.04203 | 63.18 | 2.03 |
| STRA13 + FAM83H + WHSC1 + CNOT6   | 0.0424  | 65.28 | 2.02 |
| GLYATL1 + WHSC1 + CNOT6 + ARFGAP3 | 0.04324 | 70.64 | 2.02 |
| STRA13 + CNOT6 + B3GNT9 + ARFGAP3 | 0.04421 | 67.02 | 2.01 |
| GLYATL1 + FAM83H + CNOT6 + B3GNT9 | 0.04538 | 68.36 | 2    |
| FLNA + FAM83H + WHSC1 + CLDN7     | 0.046   | 72.71 | 2.8  |
| FAM83H + KDM2A + ARFGAP3          | 0.04825 | 62.66 | 1.99 |
| OBSCN + FAM83H + KDM2A + ARFGAP3  | 0.04825 | 62.77 | 1.99 |
| CNOT6 + B3GNT9 + ARFGAP3          | 0.05115 | 62.91 | 1.97 |
| OBSCN + STRA13 + CNOT6            | 0.05257 | 63.51 | 1.95 |
| STRA13 + B3GNT9 + KDM2A + ARFGAP3 | 0.05265 | 66.48 | 1.96 |
| OBSCN + STRA13 + ARFGAP3          | 0.05312 | 66.48 | 1.96 |
| FAM83H + CNOT6 + B3GNT9 + ARFGAP3 | 0.05353 | 63.78 | 1.96 |
| FAM83H + B3GNT9 + ARFGAP3         | 0.05477 | 63.32 | 1.95 |
| FAM83H + WHSC1 + B3GNT9 + ARFGAP3 | 0.05645 | 66.09 | 1.93 |
| STRA13 + FAM83H + WHSC1           | 0.0569  | 64.6  | 1.93 |
| OBSCN + STRA13 + FAM83H + WHSC1   | 0.0569  | 64.92 | 1.93 |

|                                  |         |       |      |
|----------------------------------|---------|-------|------|
| GLYATL1 + FLNA + WHSC1 + CNOT6   | 0.05696 | 71.19 | 1.92 |
| FLNA + STRA13 + B3GNT9 + ARFGAP3 | 0.05783 | 71    | 1.92 |
| WHSC1 + KDM2A                    | 0.05887 | 64.3  | 1.93 |
| GLYATL1 + CLDN7                  | 0.05904 | 73.86 | 1.91 |
| B3GNT9 + KDM2A + ARFGAP3         | 0.05937 | 65.22 | 1.92 |
| GLYATL1 + OBSCN + CLDN7          | 0.05997 | 74.48 | 1.91 |
| GLYATL1 + OBSCN + FAM83H + CLDN7 | 0.05997 | 74.4  | 1.91 |
| CLDN7                            | 0.0603  | 66.78 | 1.92 |
| OBSCN + STRA13 + FAM83           | 0.06116 | 63.94 | 1.9  |
| OBSCN + STRA13 + WHSC1           | 0.06164 | 64.71 | 1.9  |
| WHSC1 + B3GNT9 + ARFGAP3         | 0.06233 | 66.69 | 1.9  |
| WHSC1 + B3GNT9 + KDM2A           | 0.0645  | 68.22 | 1.88 |
| STRA13 + WHSC1 + ARFGAP3         | 0.06602 | 66.83 | 1.88 |
| STRA13 + CNOT6 + B3GNT9          | 0.0667  | 64.11 | 1.88 |
| STRA13 + WHSC1 + B3GNT9 + KDM2A  | 0.0672  | 68.3  | 1.87 |
| STRA13 + CNOT6 + B3GNT9 + KDM2A  | 0.06729 | 63.02 | 1.88 |
| STRA13 + WHSC1 + CNOT6 + B3GNT9  | 0.06836 | 67.73 | 1.87 |
| STRA13 + FAM83H + CNOT6 + B3GNT9 | 0.06938 | 63.56 | 1.87 |
| WHSC1 + ARFGAP3                  | 0.07015 | 65.5  | 1.86 |
| FAM83H + ARFGAP3                 | 0.07018 | 63.34 | 1.88 |
| GLYATL1 + OBSCN                  | 0.0712  | 65.09 | 1.86 |
| GLYATL1 + OBSCN + CNOT6          | 0.0712  | 65.09 | 1.86 |
| OBSCN + STRA13 + FAM83H + KDM2A  | 0.07188 | 61.27 | 1.85 |
| STRA13 + FAM83H + CNOT6          | 0.07243 | 62.64 | 1.85 |
| FAM83H + CNOT6 + ARFGAP3         | 0.07322 | 64.3  | 1.86 |
| WHSC1 + KDM2A + ARFGAP3          | 0.07368 | 65.22 | 1.85 |
| GLYATL1 + CNOT6 + B3GNT9         | 0.07619 | 66.53 | 1.84 |
| STRA13 + WHSC1 + CNOT6 + ARFGAP3 | 0.0773  | 68.33 | 1.83 |
| FAM83H + B3GNT9 + KDM2A          | 0.07904 | 62.34 | 1.83 |
| KDM2A                            | 0.08018 | 58.44 | 1.83 |
| FAM83H + KDM2A                   | 0.08018 | 58.47 | 1.83 |
| WHSC1 + FAM83H + B3GNT9          | 0.0823  | 65.77 | 1.81 |
| FAM83H + WHSC1 + CNOT6 + B3GNT9  | 0.0828  | 66.01 | 1.81 |
| GLYATL1 + FAM83H + CNOT6 + KDM2A | 0.08453 | 64.3  | 1.81 |
| OBSCN + FAM83H + CNOT6 + ARFGAP3 | 0.08542 | 64.3  | 1.82 |
| OBSCN + STRA13 + KDM2A           | 0.08671 | 61.03 | 1.8  |
| OBSCN + KDM2A                    | 0.08674 | 59.4  | 1.8  |
| CNOT6 + B3GNT9 + KDM2A + ARFGAP3 | 0.08798 | 64.95 | 1.79 |
| OBSCN + WHSC1 + KDM2A + ARFGAP3  | 0.08814 | 65.01 | 1.79 |
| OBSCN + WHSC1 + CNOT6 + ARFGAP3  | 0.09062 | 64.76 | 1.78 |
| GLYATL1 + FAM83H + WHSC1         | 0.09081 | 69.31 | 1.78 |

|                                    |         |       |      |
|------------------------------------|---------|-------|------|
| GLYATL1 + FAM83H + WHSC1 + CNOT6   | 0.09081 | 69.14 | 1.78 |
| GLYATL1 + OBSCN + FLNA + FAM83H    | 0.09413 | 69.53 | 1.77 |
| GLYATL1 + FAM83H + KDM2A           | 0.09451 | 64.05 | 1.77 |
| STRA13 + FAM83H + ARFGAP3          | 0.09488 | 66.15 | 1.77 |
| OBSCN + STRA13 + FAM83H + ARFGAP3  | 0.09488 | 66.34 | 1.77 |
| STRA13 + FAM83H + B3GNT9 + ARFGAP3 | 0.09488 | 65.71 | 1.77 |
| WHSC1 + B3GNT9                     | 0.09761 | 66.31 | 1.76 |
| WHSC1 + CNOT6 + B3GNT9             | 0.09816 | 66.07 | 1.76 |
| FAM83H + CNOT6 + KDM2A + ARFGAP3   | 0.09845 | 63.4  | 1.76 |
| OBSCN + FAM83H + CNOT6             | 0.1032  | 59.86 | 1.75 |
| STRA13 + B3GNT9 + ARFGAP3          | 0.1034  | 65.99 | 1.75 |
| OBSCN + STRA13 + B3GNT9 + ARFGAP3  | 0.1034  | 66.09 | 1.75 |
| WHSC1 + CNOT6 + ARFGAP3            | 0.1042  | 64.84 | 1.74 |
| OBSCN + B3GNT9 + KDM2A             | 0.1069  | 62.69 | 1.74 |
| OBSCN + FAM83H + CNOT6 + B3GNT9    | 0.1083  | 62.94 | 1.73 |
| STRA13 + FAM83H + CNOT6 + ARFGAP3  | 0.1102  | 66.97 | 1.73 |
| OBSCN + FAM83H + KDM2A             | 0.1115  | 58.91 | 1.72 |
| OBSCN + FAM83H + B3GNT9 + KDM2A    | 0.1148  | 62.58 | 1.72 |
| STRA13 + ARFGAP3                   | 0.1155  | 66.48 | 1.71 |
| STRA13 + B3GNT9                    | 0.1237  | 64.08 | 1.69 |
| GLYATL1 + OBSCN + CLDN7 + CNOT6    | 0.1257  | 74.86 | 1.68 |
| OBSCN + WHSC1 + B3GNT9 + ARFGAP3   | 0.1276  | 65.9  | 1.68 |
| CNOT6 + B3GNT9 + KDM2A             | 0.1339  | 61.44 | 1.67 |
| STRA13 + FAM83H + B3GNT9           | 0.1441  | 64    | 1.64 |
| STRA13 + FAM83H + CNOT6 + KDM2A    | 0.1444  | 61.14 | 1.64 |
| OBSCN + FAM83H + WHSC1 + B3GNT9    | 0.1482  | 65.55 | 1.63 |
| FAM83H + CNOT6 + KDM2A             | 0.1496  | 59.12 | 1.63 |
| GLYATL1 + FAM83H                   | 0.1543  | 65.77 | 1.62 |
| GLYATL1 + FAM83H + CNOT6           | 0.1543  | 65.55 | 1.62 |
| STRA13 + CNOT6 + KDM2A             | 0.1559  | 60.73 | 1.62 |
| GLYATL1 + CNOT6                    | 0.1579  | 64.71 | 1.61 |
| STRA13 + CNOT6                     | 0.1592  | 62.99 | 1.61 |
| OBSCN + WHSC1 + CNOT6 + B3GNT9     | 0.1616  | 65.52 | 1.61 |
| STRA13 + FAM83H + WHSC1 + B3GNT9   | 0.1638  | 67.43 | 1.6  |
| STRA13 + WHSC1 + KDM2A + ARFGAP3   | 0.1641  | 66.8  | 1.6  |
| CNOT6 + KDM2A                      | 0.1644  | 58.09 | 1.61 |
| GLYATL1 + OBSCN + FAM83H + KDM2A   | 0.1758  | 64.08 | 1.58 |
| OBSCN + STRA13 + WHSC1 + ARFGAP3   | 0.1787  | 67.21 | 1.58 |
| CNOT6 + KDM2A + ARFGAP3            | 0.1804  | 63.7  | 1.57 |
| OBSCN + CNOT6 + KDM2A + ARFGAP3    | 0.1804  | 63.32 | 1.57 |
| STRA13 + WHSC1                     | 0.1884  | 64.65 | 1.56 |

|                                  |        |       |      |
|----------------------------------|--------|-------|------|
| OBSCN + WHSC1 + ARFGAP3          | 0.1905 | 64.6  | 1.56 |
| STRA13 + WHSC1 + B3GNT9          | 0.1928 | 66.67 | 1.55 |
| WHSC1 + CNOT6 + B3GNT9 + ARFGAP3 | 0.1929 | 67.02 | 1.55 |
| OBSCN + FAM83H + B3GNT9          | 0.1997 | 62.25 | 1.54 |
| OBSCN + CNOT6 + KDM2A            | 0.2285 | 59.61 | 1.5  |
| OBSCN + FAM83H + CNOT6 + KDM2A   | 0.2285 | 59.72 | 1.5  |
| OBSCN + WHSC1 + B3GNT9           | 0.2763 | 65.5  | 1.44 |
| STRA13 + KDM2A                   | 0.2929 | 60.81 | 1.43 |
| STRA13 + FAM83H + KDM2A          | 0.2929 | 61.03 | 1.43 |
| OBSCN + STRA13 + WHSC1 + B3GNT9  | 0.2944 | 66.53 | 1.42 |
| STRA13                           | 0.3044 | 62.72 | 1.41 |
| FAM83H                           | 0.3193 | 59.86 | 1.4  |
| WHSC1 + CNOT6                    | 0.3242 | 62.66 | 1.39 |
| OBSCN + WHSC1 + CNOT6            | 0.3303 | 62.34 | 1.39 |
| OBSCN                            | 0.3312 | 58.66 | 1.39 |
| OBSCN + CNOT6                    | 0.3312 | 58.88 | 1.39 |
| OBSCN + WHSC1                    | 0.3526 | 62.69 | 1.37 |
| OBSCN + FAM83H                   | 0.3557 | 59.64 | 1.36 |
| WHSC1                            | 0.3572 | 62.85 | 1.36 |
| STRA13 + FAM83H                  | 0.3612 | 62.45 | 1.36 |
| OBSCN + B3GNT9                   | 0.3913 | 61.3  | 1.33 |
| OBSCN + CNOT6 + B3GNT9           | 0.3988 | 61.27 | 1.33 |
| FAM83H + B3GNT9                  | 0.4328 | 61.47 | 1.3  |
| FAM83H + CNOT6 + B3GNT9          | 0.4433 | 61.6  | 1.29 |
| OBSCN + STRA13 + CNOT6 + KDM2A   | 0.5296 | 61.41 | 1.23 |
| FAM83H + CNOT6                   | 0.5317 | 59.72 | 1.23 |
| WHSC1 + FAM83H                   | 0.56   | 61.87 | 1.21 |
| OBSCN + FAM83H + WHSC1           | 0.56   | 61.79 | 1.21 |
| WHSC1 + FAM83H + CNOT6           | 0.56   | 61.93 | 1.21 |
| OBSCN + FAM83H + WHSC1 + CNOT6   | 0.56   | 61.76 | 1.21 |
| B3GNT9                           | 0.8225 | 56.35 | 0.93 |
| CNOT6                            | 0.9283 | 56.05 | 1.03 |
| CNOT6 + B3GNT9                   | 0.9544 | 58.12 | 0.98 |

**Supplementary table 2:** Candidate gene description and functions

| <b>Candidate gene</b> | <b>Description</b>                                             | <b>Functions</b>                                                                                                                          |
|-----------------------|----------------------------------------------------------------|-------------------------------------------------------------------------------------------------------------------------------------------|
| OBSCN                 | Obscurin, cytoskeletal calmodulin and titin-interacting RhoGEF | Serine/threonine kinase activity and calmodulin binding                                                                                   |
| FLNA                  | Filamin A                                                      | Actin binding protein;<br>Regulates cytoskeleton reorganisation by interacting with integrins, membrane receptors and signaling molecules |
| CLDN7                 | Claudin 7                                                      | Formation of tight junctions, Maintains cell polarity and signal transductions                                                            |
| FAM83H                | Family with sequence similarity 83, Member H                   | Structural development and calcification of tooth;<br>Keratin cytoskeleton rearrangement                                                  |
| KDM2A                 | Lysine-specific Histone demethylase2A                          | Epigenetic regulation and maintains heterochromatin state                                                                                 |
| WHSC1                 | Wolf-Hirschhorn syndrome candidate1                            | Chromatin binding and Histone-Lysine specific methyltransferase functions                                                                 |
| B3GNT9                | UDP-GlcNAc:BetaGal Beta-1.3-N-Acetylglucosaminyltransferase    | Galactosyltransferase activity<br>Protein glycosylation                                                                                   |
| GLYATL1               | Glycine N-acyltransferase like-1                               | N-acyltransferase activity                                                                                                                |
| ARFGAP3               | ADP-Ribosylation Factor GTPase-Activating protein 3            | Regulates early secretory pathways of proteins                                                                                            |
| STRA13                | Stimulated by Retinoic Acid 13                                 | Interacts with Fanconi anemia (FA) nuclear complex to facilitate DNA repair                                                               |
| CNOT6                 | CCR4-NOT Transcription complex, subunit 6                      | RNA binding; miRNA-mediated repression, mRNA degradation and transcriptional regulation                                                   |
